# Supplementary material
Source: Springer Nature journal article supplement (http://link.springer.com/content/esm/art:10.1186/1471-230X-11-126/file/MediaObjects/12876_2011_657_MOESM1_ESM.pdf)
Supplement: MOESM1 [file 12876_2011_657_MOESM1_ESM.pdf]

# PEESSTM

## Pediatric Eosinophilic Esophagitis (EoE) Symptom Score

Version 2.0

CHILDREN AND TEENS REPORT (Ages 8 - 18)

### DIRECTIONS

Tell us about your problems with EoE in the past **MONTH**.

There are no right or wrong answers. Please circle the best number.

Please answer the question in the Frequency section and then the related question in the Severity section.

#### Frequency

| Never | Almost never<br>(less than once a week) | Sometimes<br>(1 or more times a week) | Often<br>(1 time a day) | Almost always<br>(2 or more times a day) |
|-------|-----------------------------------------|---------------------------------------|-------------------------|------------------------------------------|
|-------|-----------------------------------------|---------------------------------------|-------------------------|------------------------------------------|

How often do you get sick?

|   |   |   |   |   |
|---|---|---|---|---|
| 0 | 1 | 2 | 3 | 4 |
|---|---|---|---|---|

#### Severity

| Not bad at all<br> | A little bad<br> | Kind of bad<br> | Bad<br> | Very bad<br> |
|--------------------------------------------------------------------------------------------------------|------------------------------------------------------------------------------------------------------|-----------------------------------------------------------------------------------------------------|---------------------------------------------------------------------------------------------|--------------------------------------------------------------------------------------------------|
|--------------------------------------------------------------------------------------------------------|------------------------------------------------------------------------------------------------------|-----------------------------------------------------------------------------------------------------|---------------------------------------------------------------------------------------------|--------------------------------------------------------------------------------------------------|

How bad is it when you get sick?

|   |   |   |   |   |
|---|---|---|---|---|
| 0 | 1 | 2 | 3 | 4 |
|---|---|---|---|---|

#### Office Use Only

Study ID:           Subject ID:       Date Completed:   /   /

Month                      Day                      Year

# Tell us about your problems with EoE in the past MONTH.

## Frequency

| Never | Almost never<br>(less than once a week) | Sometimes<br>(1 or more times a week) | Often<br>(1 time a day) | Almost always<br>(2 or more times a day) |
|-------|-----------------------------------------|---------------------------------------|-------------------------|------------------------------------------|
|-------|-----------------------------------------|---------------------------------------|-------------------------|------------------------------------------|

1. How often do you have chest pain, ache, or hurt?

|   |   |   |   |   |
|---|---|---|---|---|
| 0 | 1 | 2 | 3 | 4 |
|---|---|---|---|---|

3. How often do you have heartburn (burning in your chest, mouth, or throat)?

|   |   |   |   |   |
|---|---|---|---|---|
| 0 | 1 | 2 | 3 | 4 |
|---|---|---|---|---|

5. How often do you have stomach aches or belly aches?

|   |   |   |   |   |
|---|---|---|---|---|
| 0 | 1 | 2 | 3 | 4 |
|---|---|---|---|---|

7. How often do you have trouble swallowing?

|   |   |   |   |   |
|---|---|---|---|---|
| 0 | 1 | 2 | 3 | 4 |
|---|---|---|---|---|

9. How often do you feel like food gets stuck in your throat or chest?

|   |   |   |   |   |
|---|---|---|---|---|
| 0 | 1 | 2 | 3 | 4 |
|---|---|---|---|---|

11. How often do you need to drink a lot to help swallow your food?

|   |   |   |   |   |
|---|---|---|---|---|
| 0 | 1 | 2 | 3 | 4 |
|---|---|---|---|---|

13. How often do you vomit (throw up)?

|   |   |   |   |   |
|---|---|---|---|---|
| 0 | 1 | 2 | 3 | 4 |
|---|---|---|---|---|

15. How often do you feel nauseous (feel like you're going to throw up, but don't)?

|   |   |   |   |   |
|---|---|---|---|---|
| 0 | 1 | 2 | 3 | 4 |
|---|---|---|---|---|

## Severity

| Not bad at all                                                                      | A little bad                                                                        | Kind of bad                                                                         | Bad                                                                                 | Very bad                                                                            |
|-------------------------------------------------------------------------------------|-------------------------------------------------------------------------------------|-------------------------------------------------------------------------------------|-------------------------------------------------------------------------------------|-------------------------------------------------------------------------------------|
|  |  |  |  |  |

2. How bad is the chest pain, ache, or hurt?

|   |   |   |   |   |
|---|---|---|---|---|
| 0 | 1 | 2 | 3 | 4 |
|---|---|---|---|---|

4. How bad is your heartburn (burning in your chest, mouth, or throat)?

|   |   |   |   |   |
|---|---|---|---|---|
| 0 | 1 | 2 | 3 | 4 |
|---|---|---|---|---|

6. How bad are the stomach aches or belly aches?

|   |   |   |   |   |
|---|---|---|---|---|
| 0 | 1 | 2 | 3 | 4 |
|---|---|---|---|---|

8. How bad is the trouble swallowing?

|   |   |   |   |   |
|---|---|---|---|---|
| 0 | 1 | 2 | 3 | 4 |
|---|---|---|---|---|

10. How bad is it when food gets stuck in your throat or chest?

|   |   |   |   |   |
|---|---|---|---|---|
| 0 | 1 | 2 | 3 | 4 |
|---|---|---|---|---|

12. How bad is it if you don't drink a lot to help swallow your food?

|   |   |   |   |   |
|---|---|---|---|---|
| 0 | 1 | 2 | 3 | 4 |
|---|---|---|---|---|

14. How bad is the vomiting (throwing up)?

|   |   |   |   |   |
|---|---|---|---|---|
| 0 | 1 | 2 | 3 | 4 |
|---|---|---|---|---|

16. How bad is the nausea (feeling like you're going to throw up, but don't)?

|   |   |   |   |   |
|---|---|---|---|---|
| 0 | 1 | 2 | 3 | 4 |
|---|---|---|---|---|

Please turn to the next page for the rest of the questions. Thank you!

Next page 

# Tell us about your problems with EoE in the past MONTH.

## Frequency

| Never | Almost never<br>(less than once a week) | Sometimes<br>(1 or more times a week) | Often<br>(1 time a day) | Almost always<br>(2 or more times a day) |
|-------|-----------------------------------------|---------------------------------------|-------------------------|------------------------------------------|
|-------|-----------------------------------------|---------------------------------------|-------------------------|------------------------------------------|

17. How often does food come back up your throat when eating?

|   |   |   |   |   |
|---|---|---|---|---|
| 0 | 1 | 2 | 3 | 4 |
|---|---|---|---|---|

19. How often do you eat less food than others?

|   |   |   |   |   |
|---|---|---|---|---|
| 0 | 1 | 2 | 3 | 4 |
|---|---|---|---|---|

20. How often do you need more time to eat than others?

|   |   |   |   |   |
|---|---|---|---|---|
| 0 | 1 | 2 | 3 | 4 |
|---|---|---|---|---|

## Severity

| Not bad at all                                                                      | A little bad                                                                        | Kind of bad                                                                         | Bad                                                                                 | Very bad                                                                            |
|-------------------------------------------------------------------------------------|-------------------------------------------------------------------------------------|-------------------------------------------------------------------------------------|-------------------------------------------------------------------------------------|-------------------------------------------------------------------------------------|
|  |  |  |  |  |

18. How bad is the food coming back up your throat when eating?

|   |   |   |   |   |
|---|---|---|---|---|
| 0 | 1 | 2 | 3 | 4 |
|---|---|---|---|---|

Thank you very much for participating!
